# Supplementary material
Source: PubMed Central journal article supplement (PMC6145669)
Supplement: jamapsychiatry-75-713-s001.pdf [file jamapsychiatry-75-713-s001.pdf]

## Supplementary Online Content

Ross EL, Zivin K, Maixner DF. Cost-effectiveness of electroconvulsive therapy vs pharmacotherapy/psychotherapy for treatment-resistant depression in the United States. *JAMA Psych*. Published online May 9, 2018. doi:10.1001/jamapsychiatry.2018.0768

**eAppendix.** Model States and Transitions

**eTable.** Scenario Sensitivity Analysis Results

This supplementary material has been provided by the authors to give readers additional information about their work.

## Model states and transitions

We develop a deterministic Markov model with discrete one-month time-steps to simulate the treatment of major depressive disorder in the United States. The structure of the model is diagrammed in **Figure 1** of the main text. The disease states within the model and transitions between them are described below.

### Initiation

Upon starting a new line of treatment, simulated patients spend one time-step in the initiation state before the outcome of that treatment is determined. These states are denoted by **I<sub>1</sub>** for first-line initiation, **I<sub>2</sub>** for second-line initiation, etc. This state is intended to capture the delayed onset of treatment efficacy, as well as the time needed to ensure an adequate trial of a treatment before switching to a different treatment.<sup>1-3</sup>

### Remission, response, non-response

After spending one time-step in initiation, patients transition to one of three states intended to capture their acute response to treatment. Remission (**R<sub>1</sub>**, **R<sub>2</sub>**, etc.) indicates a near-complete resolution of depressive symptoms, as measured by one of several commonly-used rating scales; response (**S<sub>1</sub>**, **S<sub>2</sub>**, etc.) indicates  $\geq 50\%$  resolution of depressive symptoms; and non-response (**F<sub>1</sub>**, **F<sub>2</sub>**, etc.) indicates  $< 50\%$  resolution of depressive symptoms.<sup>4,5</sup> To determine the proportion of patients entering each outcome state, each line of treatment is characterized by a probability of remission, **a**, a probability of response, **b**, and a probability of non-response, **1 – a – b**.

### Relapse

Patients who have achieved remission or response on a given line of treatment may subsequently transition into the relapse state (**E<sub>1</sub>**, **E<sub>2</sub>**, etc.), reflecting a return of depressive symptoms.<sup>4</sup> Each line of treatment is characterized by a probability of relapse for those with initial remission, **d<sub>R</sub>**, and a probability of relapse for those with initial response, **d<sub>S</sub>**; patients in remission (**R**) or response (**S**) are subject to these relapse probabilities during every model time-step. Those patients in the non-response (**F**) or relapse (**E**) states for treatment lines 1-8 transition to initiation (**I**) of the subsequent treatment line during the next model time-step.

### Mortality and competing risks

The population of patients in the model is characterized by a probability of mortality per time-step, **μ**. Patients in all model states are subject to this mortality probability; for clarity, mortality probabilities are not shown in **Figure 1**. As mortality is possible in any model state, patients in a given state are subject to competing risks; for example, a patient in remission on 1<sup>st</sup>-line antidepressant treatment is subject to probabilities of death, relapse, and continued remission. To handle this, we treat mortality as an overriding risk; that is, only those patients who don't die in a time-step are subject to risks of relapse or other such transitions within the model.

### Cost inflation

There are several nationally representative indices that can be used to inflate/deflate healthcare costs to a given year; in this analysis, we use an index called the medical care expenditure index (MCE).<sup>6,7</sup> The MCE has two main benefits over other available indices. First, disease-specific inflation estimates are available, which show a different inflation rate for treatment of mental illness as compared with e.g.

infectious diseases. Second, the MCE indices are designed to reflect changes in both unit costs and patterns of treatment for a given illness over time, rather than the change in price of a static bundle of goods and services.

Prior research has shown that, in the case of depression, using the MCE approach to evaluate inflation produces more conservative estimates of cost growth than other approaches do.<sup>8</sup> In our analysis, we find that our model's cost outcomes are well-validated by recent, independent data on overall costs of depression care, which lends support to the decision to use the more conservative MCE index.

### Parameter covariance in probabilistic sensitivity analysis

Probabilistic sensitivity analysis (PSA) produces an estimate of the aggregate uncertainty in a model's outcomes, given the individual uncertainty distributions surrounding each parameter within the model. Along with the uncertainty in each parameter's value, the covariance between parameters may be an important factor in determining overall uncertainty in outcomes. Prior research has shown that in some cases, treating probabilistic inputs as independent from one another may underestimate overall uncertainty.<sup>9</sup> To address this, we perform two separate PSAs. In the PSA with *independent parameter variance*, the value of each parameter is based on an independently drawn random variable between 0 and 1 applied to its probability distribution. In the PSA with *linked parameter variance*, a single random variable between 0 and 1 is drawn and applied in concert for every parameter within each of the following groups: depression costs for lines 1-9, initial remission and response probabilities for lines 1-9, relapse probabilities for lines 1-9, and initial and maintenance costs of ECT. The latter approach likely overestimates the degree of covariance between these parameters, but can help establish an upper bound on overall uncertainty.

## References

1. American Psychiatric Association. Practice guideline for the treatment of patients with major depressive disorder, third edition. [http://psychiatryonline.org/pb/assets/raw/sitewide/practice\\_guidelines/guidelines/mdd.pdf](http://psychiatryonline.org/pb/assets/raw/sitewide/practice_guidelines/guidelines/mdd.pdf). Accessed August 27, 2017.
2. Kennedy SH, Lam RW, McIntyre RS, et al. Canadian Network for Mood and Anxiety Treatments (CANMAT) 2016 clinical guidelines for the management of adults with major depressive disorder: Section 3. Pharmacological treatments. *Can J Psychiatry*. 2016;61(9):540-560.
3. Husain MM, Rush AJ, Fink M, et al. Speed of response and remission in major depressive disorder with acute electroconvulsive therapy (ECT): a consortium for research in ECT (CORE) report. *J Clin Psychiatry*. 2004;65(4):485-491.
4. Rush AJ, Trivedi MH, Wisniewski SR, et al. Acute and longer-term outcomes in depressed outpatients requiring one or several treatment steps: a STAR\*D report. *Am J Psychiatry*. 2006;163(11):1905-1917.
5. Kolshus E, Jelovac A, McLoughlin DM. Bitemporal v. high-dose right unilateral electroconvulsive therapy for depression: a systematic review and meta-analysis of randomized controlled trials. *Psychol Med*. 2017;47:518-530.
6. Dunn A, Grosse SD, Zuvekas SH. Adjusting health expenditures for inflation: a review of measures for health services research in the United States [published online November 21, 2016]. *Health Serv Res*.
7. Bureau of Economic Analysis. Medical care expenditure indices from MEPS. [https://www.bea.gov/national/health\\_care\\_satellite\\_account.htm](https://www.bea.gov/national/health_care_satellite_account.htm). Accessed August 11, 2017.
8. Frank RG, Berndt ER, Busch SH. Price indexes for the treatment of depression. Working paper No. 6417. *Natl Bur Econ Res*. 1998:1-39.
9. Taylor M. The implications of parameter independence in probabilistic sensitivity analysis. In: *International Society for Pharmacoeconomics and Outcomes Research 19th Annual European Congress*. Vienna, Austria; 2016.

## Supplementary tables

eTable 1: Scenario sensitivity analysis results

| Strategy                  | Pharmacotherapy efficacy data from Weinmann et al. and Amsterdam et al. |       |                 | Pharmacotherapy efficacy data from STAR*D trial only |       |                 | Depression cost data from Gibson et al. |       |                 |
|---------------------------|-------------------------------------------------------------------------|-------|-----------------|------------------------------------------------------|-------|-----------------|-----------------------------------------|-------|-----------------|
|                           | Costs (2013 USD)                                                        | QALYs | ICER (USD/QALY) | Costs (2013 USD)                                     | QALYs | ICER (USD/QALY) | Costs (2013 USD)                        | QALYs | ICER (USD/QALY) |
| No ECT                    | 40,210                                                                  | 2.71  | –               | 46,220                                               | 2.53  | –               | 37,820                                  | 2.63  | –               |
| 6 <sup>th</sup> -line ECT | 46,670                                                                  | 2.79  | Dominated       | 55,440                                               | 2.68  | Dominated       | 44,900                                  | 2.75  | Dominated       |
| 5 <sup>th</sup> -line ECT | 47,170                                                                  | 2.80  | 81,000          | 54,920                                               | 2.69  | Dominated       | 45,120                                  | 2.76  | Dominated       |
| 4 <sup>th</sup> -line ECT | 48,910                                                                  | 2.81  | Dominated       | 55,790                                               | 2.70  | Dominated       | 45,460                                  | 2.76  | Dominated       |
| 3 <sup>rd</sup> -line ECT | 48,630                                                                  | 2.81  | 90,000          | 53,610                                               | 2.71  | 43,000          | 45,800                                  | 2.77  | 58,000          |
| 2 <sup>nd</sup> -line ECT | 50,980                                                                  | 2.82  | 484,000         | 54,470                                               | 2.71  | 152,000         | 47,770                                  | 2.77  | 513,000         |
| 1 <sup>st</sup> -line ECT | 53,500                                                                  | 2.82  | 815,000         | 56,630                                               | 2.71  | 716,000         | 50,280                                  | 2.78  | 809,000         |

USD, United States dollars; QALY, quality-adjusted life-year; ICER, incremental cost-effectiveness ratio; ECT, electroconvulsive therapy

eTable 1 (continued): Scenario sensitivity analysis results

| Strategy                  | Suicide mortality reduced with remission or response of depression |       |                    | First ECT course provided without maintenance ECT |       |                    |
|---------------------------|--------------------------------------------------------------------|-------|--------------------|---------------------------------------------------|-------|--------------------|
|                           | Costs<br>(2013 USD)                                                | QALYs | ICER<br>(USD/QALY) | Costs<br>(2013 USD)                               | QALYs | ICER<br>(USD/QALY) |
| No ECT                    | 42,420                                                             | 2.64  | –                  | 42,490                                            | 2.63  | –                  |
| 6 <sup>th</sup> -line ECT | 50,130                                                             | 2.75  | Dominated          | 50,210                                            | 2.79  | Dominated          |
| 5 <sup>th</sup> -line ECT | 49,890                                                             | 2.76  | Dominated          | 49,930                                            | 2.80  | Dominated          |
| 4 <sup>th</sup> -line ECT | 50,950                                                             | 2.77  | Dominated          | 50,340                                            | 2.81  | Dominated          |
| 3 <sup>rd</sup> -line ECT | 49,880                                                             | 2.77  | 54,000             | 50,410                                            | 2.82  | 42,000             |
| 2 <sup>nd</sup> -line ECT | 52,050                                                             | 2.78  | 557,000            | 51,700                                            | 2.82  | 335,000            |
| 1 <sup>st</sup> -line ECT | 54,560                                                             | 2.78  | 802,000            | 54,660                                            | 2.83  | 1,035,000          |

USD, United States dollars; QALY, quality-adjusted life-year; ICER, incremental cost-effectiveness ratio; ECT, electroconvulsive therapy
